# Supplementary figures and images for: Perceptions of Harmfulness of Heated Tobacco Products Compared to Combustible Cigarettes among Adult Smokers in Japan: Findings from the 2018 ITC Japan Survey
Source: MDPI journal article supplement (doi:10.3390/ijerph17072394), 2020-04-01

**Figure S1.** Study Flow Diagram

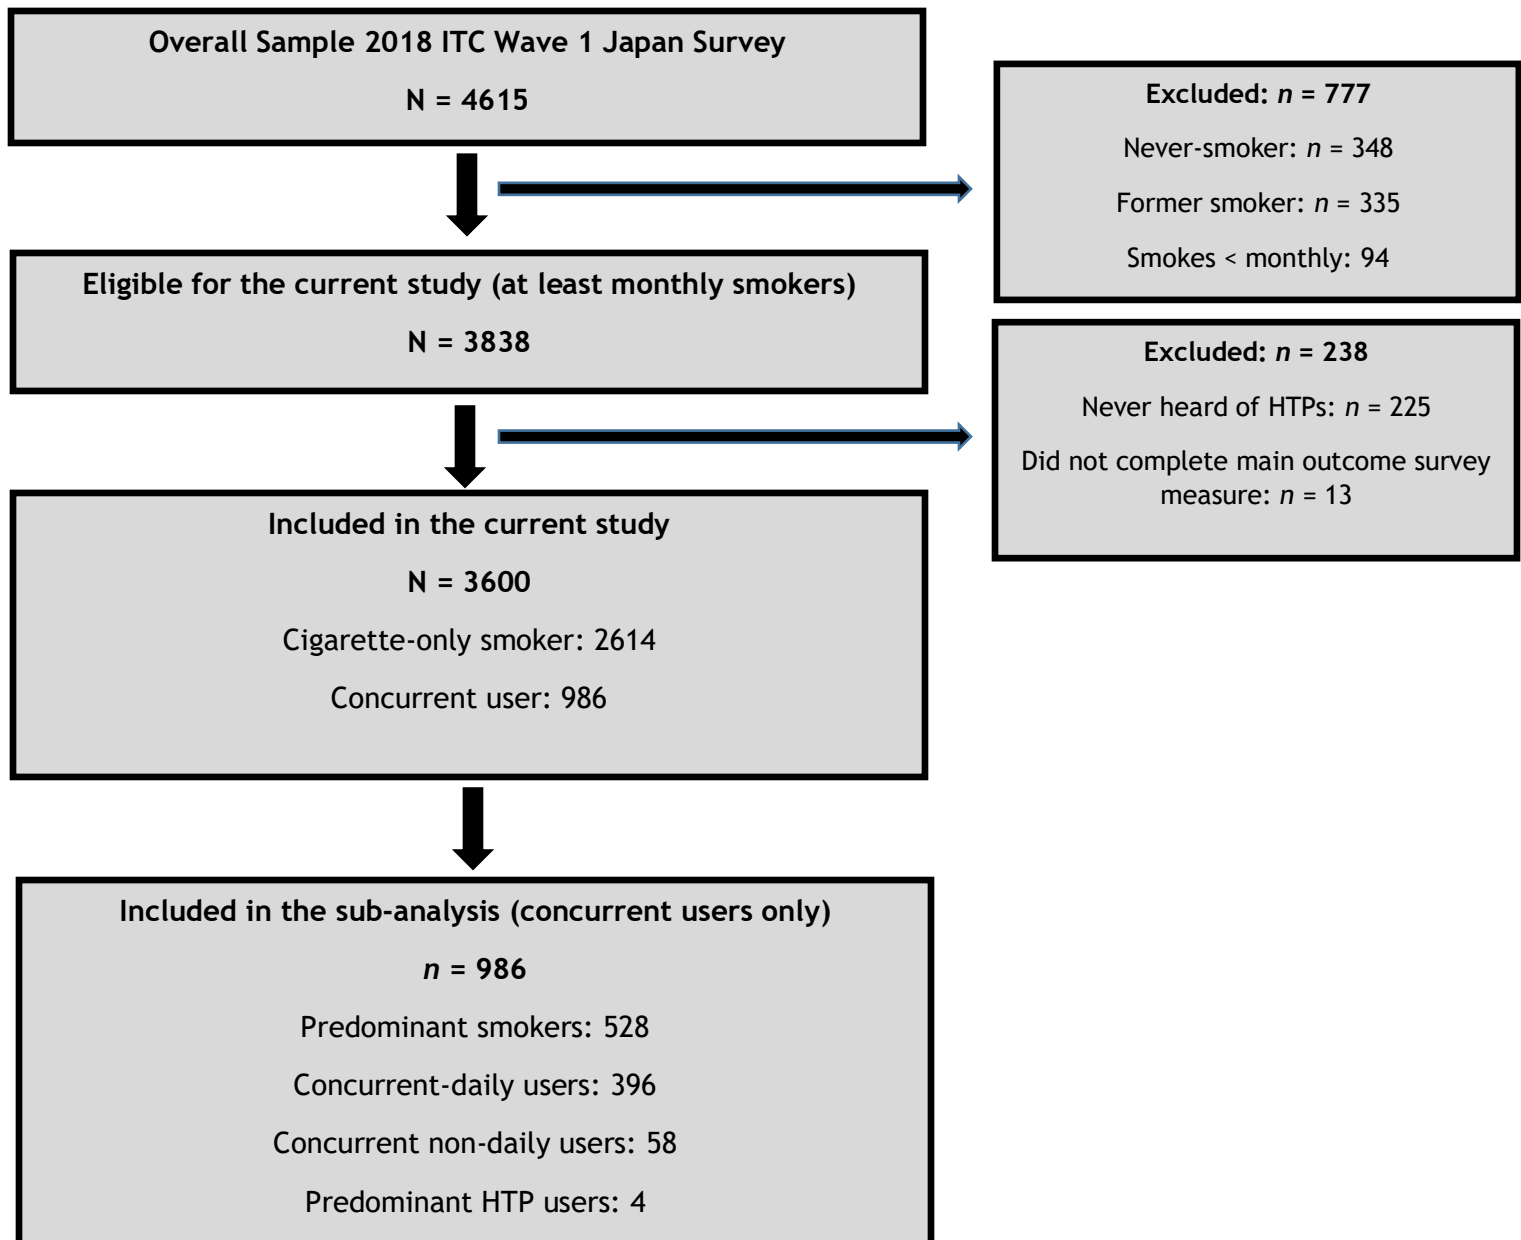

Supplement: s1 [file s1]
